# Supplementary material for: Real-world COVID-19 vaccine effectiveness against the Omicron BA.2 variant in a SARS-CoV-2 infection-naive population
Source: Springer Nature journal article supplement (doi:10.1038/s41591-023-02219-5), 2023-01-18
Supplement: MOESM1 [file 41591_2023_2219_MOESM1_ESM.pdf]

# **Real-world COVID-19 vaccine effectiveness against the Omicron BA.2 variant in a SARS-CoV-2 infection-naïve population**

---

In the format provided by the  
authors and unedited

**Supplementary Table 1. Parameters subject to statistical inference.**

| <b>Parameters</b>                                     | <b>Description</b>                                                                                                                                                                              |
|-------------------------------------------------------|-------------------------------------------------------------------------------------------------------------------------------------------------------------------------------------------------|
| $VE_{v,j}(0)$ for $v \in \{B, C\}, j \in \{2, 3, 4\}$ | Initial vaccine effectiveness conferred by each successive dose of vaccine                                                                                                                      |
| $\lambda_v$ for $v = \{B, C\}$                        | Waning rate of VE                                                                                                                                                                               |
| $\gamma$                                              | The scaling factor that related FOI to sewage viral load                                                                                                                                        |
| $f(10), f(18), f(50)$ and $f(65)$                     | The effect of age on FOI for age 10, 18, 50 and 65 years                                                                                                                                        |
| $q_{sens,v}$ and $q_{spec,v}$ for $v \in \{U, B, C\}$ | Sensitivity and specificity of serological assays for detecting recent Omicron infection among unvaccinated individuals ( $U$ ) and those vaccinated with BNT162b2 ( $B$ ) or Coronavac ( $C$ ) |
